# THE JOURNAL OF NEUROPSYCHIATRY and Clinical Neurosciences

The Official Journal of the American Neuropsychiatric Association

## In this issue:

- Update on Mild Traumatic Brain Injury: Neuropathology and Structural Imaging
- What Neuropsychiatrists Would Like to See in DSM-5
- Hippocampal Volumes in Patients With Chronic Combat-Related Posttraumatic Stress Disorder: A Systematic Review
- Man Versus Machine: Comparison of Radiologists' Interpretations and NeuroQuant<sup>®</sup> Volumetric Analyses
- Neuropsychiatric Disease in Patients With Periventricular Heterotopia

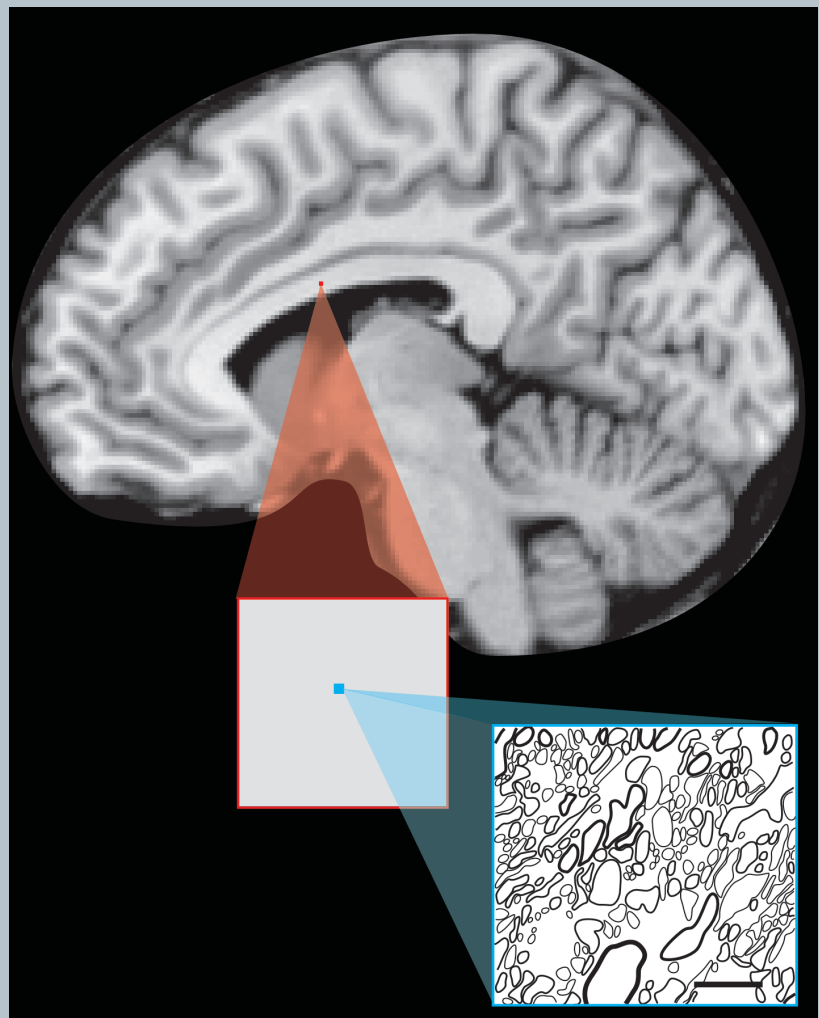

Source: https://neuro.psychiatryonline.org/doi/suppl/10.1176/jnp.2013.25.issue-1/suppl_file/cover.pdf
