Planning

Inhibitory Control

Flexibility

Self-Monitoring

Emotion Regulation

Initiation

Attention

Working Memory

Organization

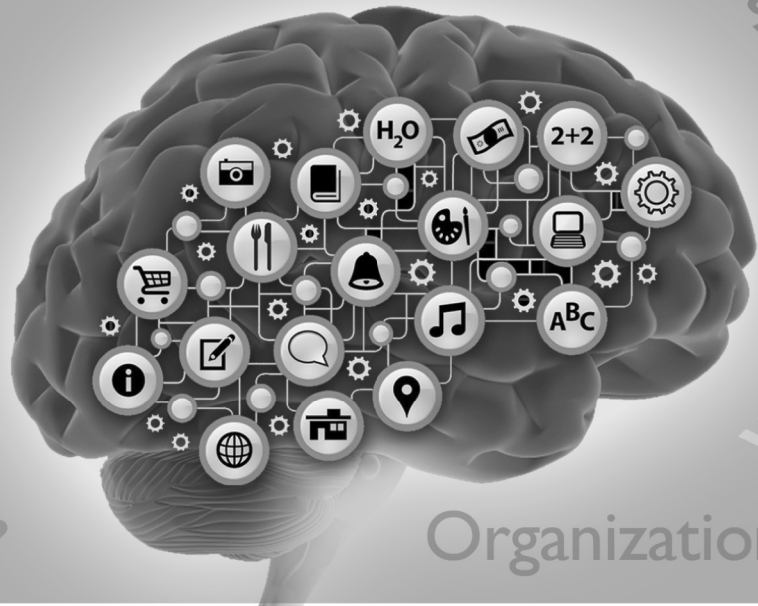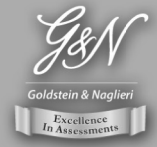

# Measure Strengths & Weaknesses in Executive Function

## CEFI™ Comprehensive Executive Function Inventory

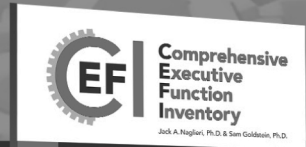

Build a comprehensive evaluation across a Full Scale as well as 9 CEFI Scales in youth aged 5 to 18 years.

Available In  
**SPANISH**  
español

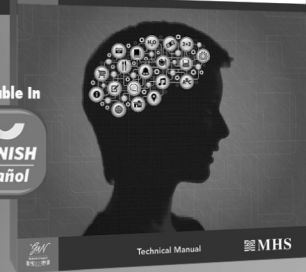

- **Research you can trust** with a large scale normative sample representative of U.S. population on a number of key demographic variables including region.
- **Implement intervention strategies** provided within reports when below average behavior scores are measured.
- **Feel confident with accurate results** with multi-rater reports that present an expansive view of the youth's behavior.
- **Save time** by administering and scoring online. Create instant, easy to use, and accurate reports at the click of a button.
- **Useful in a variety of settings** including diagnostic evaluations, planning & progress monitoring for intervention programs, and in research environments.

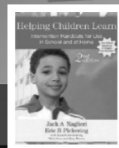

**FREE Book Offer!**  
A \$40 value!  
Visit [mhs.com/cefi](http://mhs.com/cefi) for further details.

[mhs.com/CEFI](http://mhs.com/CEFI)

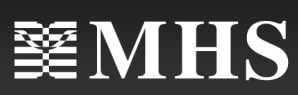

To order or for more information about CEFI contact us today.  
TEL: (USA) 1.800.456.3003 • (CAN) 1.800.268.6011  
EMAIL: [customerservice@mhs.com](mailto:customerservice@mhs.com) WEBSITE: [mhs.com/cefi](http://mhs.com/cefi)

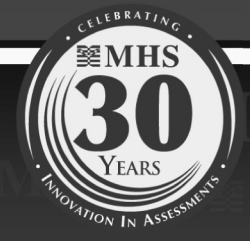

# THE JOURNAL OF NEUROPSYCHIATRY and Clinical Neurosciences

The Official Journal of the American Neuropsychiatric Association

**Stuart C. Yudofsky, M.D.**  
*Editor*

**Robert E. Hales, M.D., M.B.A.**  
*Deputy Editor*

**Andrea Lynn Sanders, A.A.S.**  
*Assistant to the Editors*

#### **Consulting Editors**

Floyd Bloom, M.D.  
Edward G. Jones, M.D., Ph.D.  
Eric R. Kandel, M.D.  
Henry Nasrallah, M.D.  
Solomon H. Snyder, M.D.

#### **Associate Editors**

Nancy C. Andreasen, M.D., Ph.D.  
David B. Arciniegas, M.D.  
Nashaat N. Boutros, M.D.  
C. Edward Coffey, M.D.  
Joseph T. Coyle, M.D.  
Jeffrey L. Cummings, M.D.  
Michael Ebert, M.D.  
Dwight L. Evans, M.D.  
Robert C. Green, M.D.  
Edward C. Lauterbach, M.D.  
Thomas W. McAllister, M.D.  
John M. Morihisa, M.D.

Charles Nemeroff, M.D., Ph.D.  
Thomas C. Neylan, M.D.  
Trevor R. P. Price, M.D.  
Robert G. Robinson, M.D.  
Stephen Salloway, M.D., M.S.  
Randolph B. Schiffer, M.D.  
Jonathan M. Silver, M.D.  
Robert Stern, Ph.D.  
Paula T. Trzepacz, M.D.  
Daniel R. Weinberger, M.D.

#### **Neuropsychiatric Practice and Opinion Editor**

Fred Ovsiew, M.D.

#### **Neuropsychiatry Classics Editor**

Thomas C. Neylan, M.D.

#### **Book Review Editor**

Paula T. Trzepacz, M.D.

#### **Windows to the Brain Editors**

Robin A. Hurley, M.D.  
L. Anne Hayman, M.D.  
Katherine H. Taber, Ph.D.

#### **Research and Statistical Design Consultants**

Douglas Mossman, M.D.  
Eugene Somoza, M.D., Ph.D.

#### **American Psychiatric Publishing**

Rebecca D. Rinehart  
*Publisher*

Michael Roy  
*Editorial Director, Journals*

Elizabeth Stone  
*Senior Editor*

Y. Nicole Gray  
*Editorial Support Services Manager*

Patrick Hansard  
*Director of Marketing and Sales*

Christopher Keene  
*Sales Manager*  
(703) 907-8538

Roger Domras  
*Director of Fulfillment and Circulation*

*The Journal of Neuropsychiatry and Clinical Neurosciences*, (ISSN 0895-0172), is published quarterly by the American Psychiatric Association (APA), 1000 Wilson Blvd., Suite 1825, Arlington, VA 22209. Copyright © 2013 American Psychiatric Association. *The Journal of Neuropsychiatry and Clinical Neurosciences* is protected by copyright and may not be reproduced in any manner without written permission. *The Journal of Neuropsychiatry and Clinical Neurosciences* is abstracted/indexed in *Chemical Abstracts*, *Current Contents/Clinical Medicine*<sup>®</sup>, *EMBASE/Excerpta Medica*, *Index Medicus/MEDLINE/MEDLARS*, *PsycINFO*, *Psychological Abstracts*, *Research Alert*<sup>®</sup>, and *Sci Search*<sup>®</sup>. It is available through University Microfilms, Inc., 300 North Zeeb Road, Ann Arbor, MI 48106, in microform, electronic, or paper format.

Manuscript submissions should no longer be sent by mail. Please visit <http://mc.manuscriptcentral.com> to upload a paper online.

U.S. subscriptions are \$229 per year (4 issues) individual; \$183 for APA members; international subscriptions are \$345 per year. APA Members receive 20% discount off regular individual subscription rate. Institutional Subscriptions are tier priced. For institutional site license information and pricing, please email us at [appi@psych.org](mailto:appi@psych.org), call (800) 368-5777 or visit [www.appi.org/ForLibrarians/](http://www.appi.org/ForLibrarians/). *The Journal of Neuropsychiatry and Clinical Neurosciences*, 1000 Wilson Blvd., Suite 1825, Arlington, VA 22209.

Advertising inquiries may be directed to Tim Wolfinger at PMI, 30 East 33rd St., New York, NY 10016; (212) 904-0379; [twolfinger@pminy.com](mailto:twolfinger@pminy.com).

APA is not responsible for statements made in this publication by contributors or advertisers. Unless stated, material in *The Journal of Neuropsychiatry and Clinical Neurosciences* does not reflect the endorsement, official attitude, or position of APA or the American Neuropsychiatric Association.

Periodicals postage paid at Arlington, VA, and additional mailing offices. POSTMASTER: Send address changes to *The Journal of Neuropsychiatry and Clinical Neurosciences*, 1000 Wilson Blvd., Suite 1825, Arlington, VA 22209.

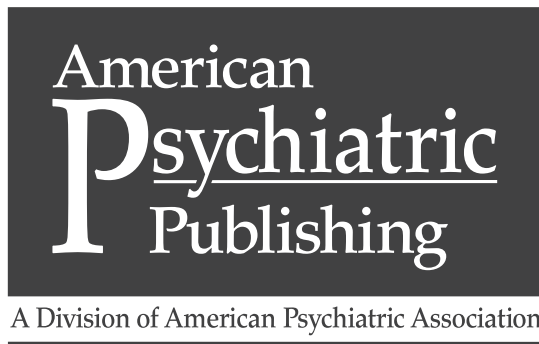

Please visit the Journal's web site at <http://neuro.psychiatryonline.org>
